# Supplementary material
Source: PubMed Central journal article supplement (PMC6398340)

# Reconstruction of body motion during self-reported losses of balance in community-dwelling older adults

## Supplement – Example Reconstruction Videos

Lauro V. Ojeda<sup>1,\*</sup>, Peter G. Adamczyk<sup>2</sup>, John R. Rebula<sup>1</sup>, Linda V. Nyquist<sup>3</sup>, Debra M. Strasburg<sup>3</sup>,  
Neil B. Alexander<sup>3,5</sup>

<sup>1</sup>Department of Mechanical Engineering, University of Michigan, Ann Arbor

<sup>2</sup>Department of Mechanical Engineering, University of Wisconsin-Madison; Intelligent Prosthetic Systems, LLC, Madison, Wisconsin

<sup>3</sup>Division of Geriatric and Palliative Medicine, Department of Internal Medicine, University of Michigan, Ann Arbor

<sup>4</sup>VA Ann Arbor Health Care System Geriatrics Research Education and Clinical Center

<sup>5</sup>Department of Internal Medicine, University of Michigan, Ann Arbor. Ann Arbor Health Care System Geriatrics Research Education and Clinical Center

# Example - Fig. 2

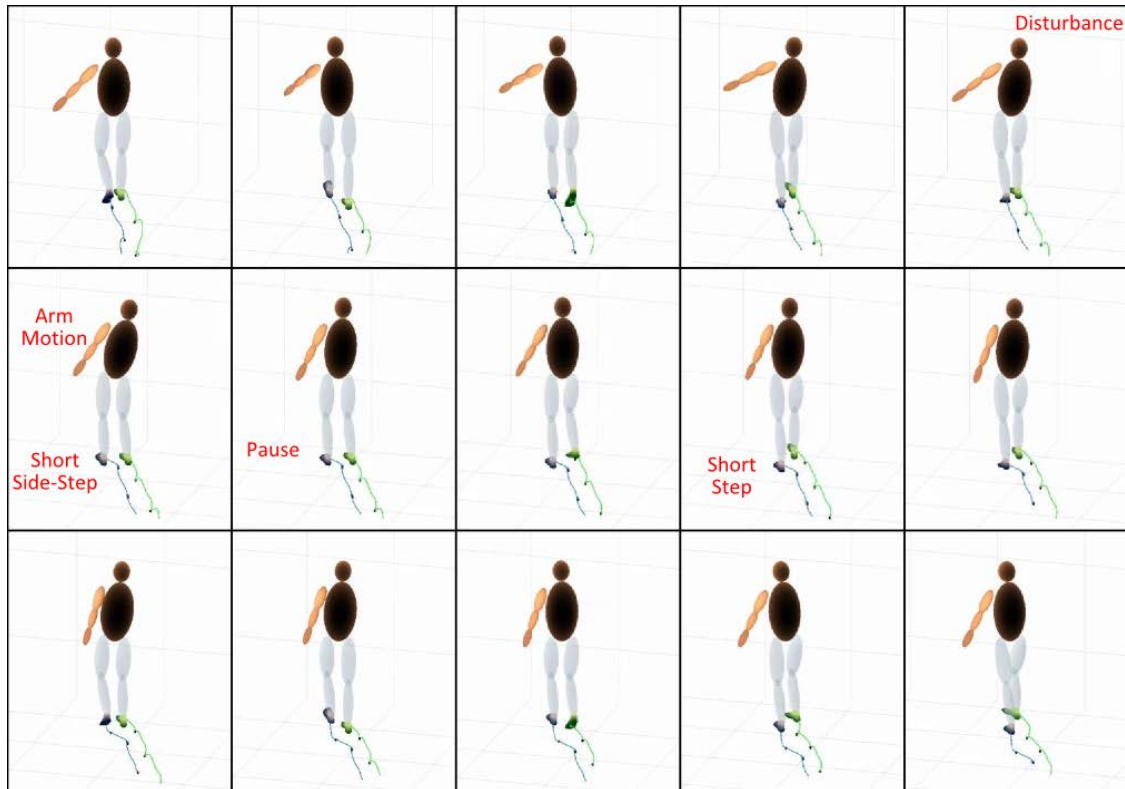

Figure 2 A loss of balance experienced by participant #1, with voice annotation, “Walking in the parking lot—lost my balance—regained my balance by touching the car”

The signals show a change in trunk pitch angle followed by a pattern of short steps used to recover. The cause of this LOB is not known, but a side-step and pause illustrates the recovery technique.

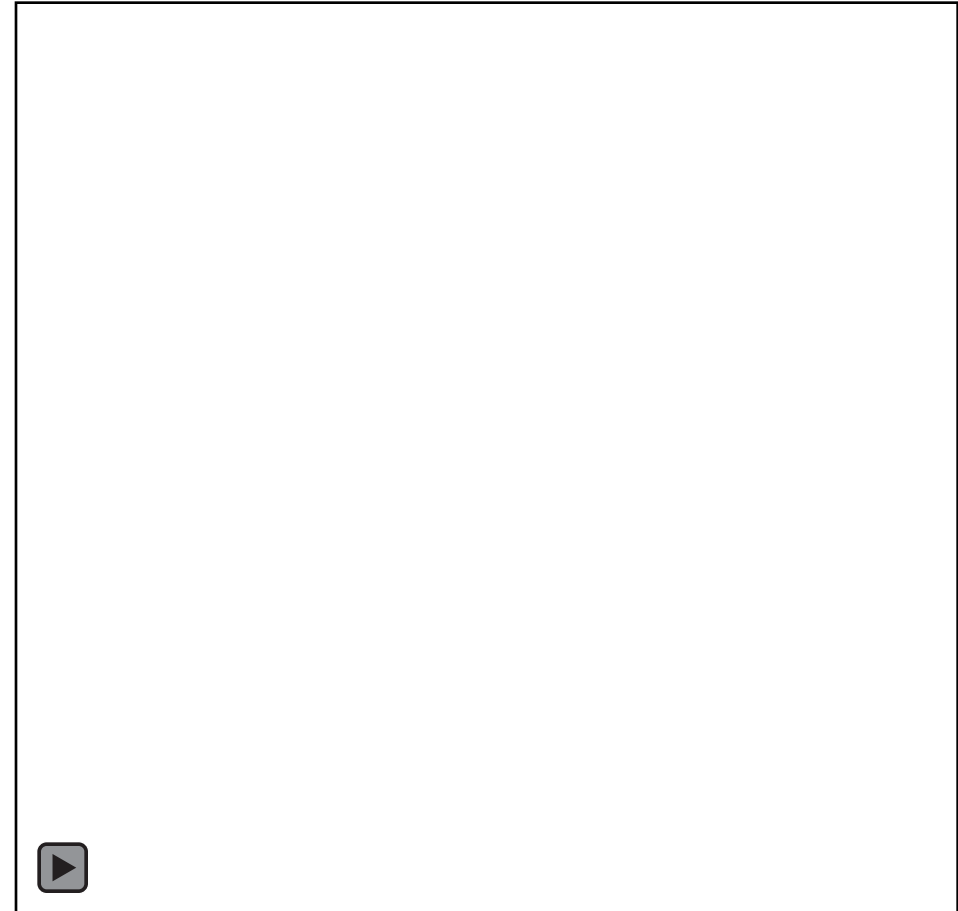

# Example - Fig. 3

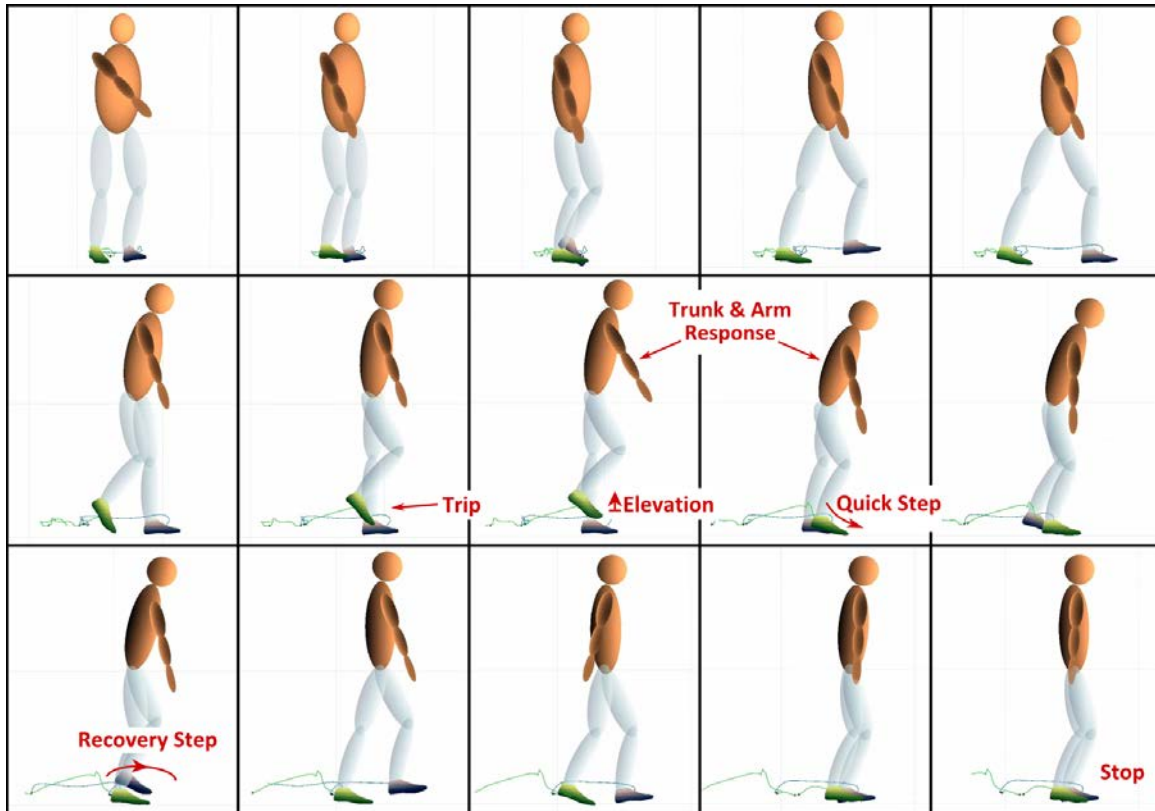

Figure 3. Another loss of balance experienced by participant #1, with voice annotation: “Lost balance when I was in by the computer—regained balance without fully falling.”

The right toe is caught on a stationary object, which interrupts its motion, forcing a quick step, followed by a recovery in mid-step on the left. The animation also shows immediate compensatory arm and trunk motion.

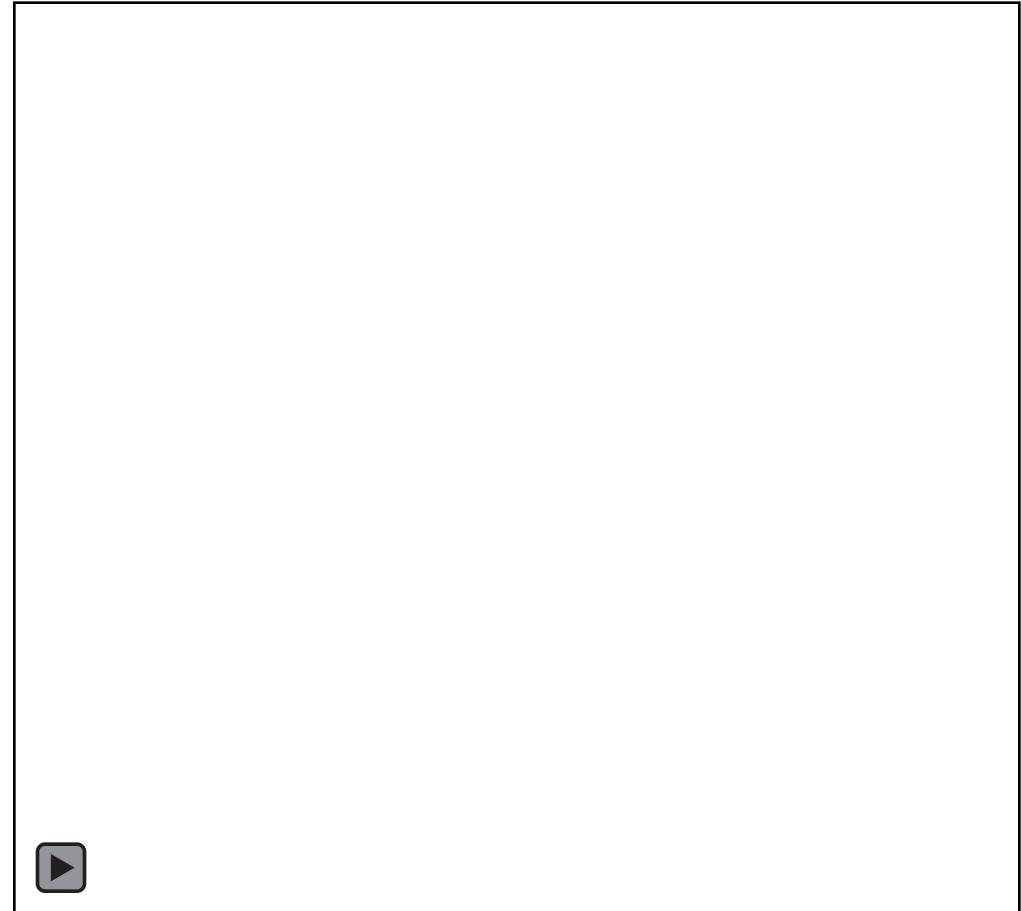

# Example - Fig. 4

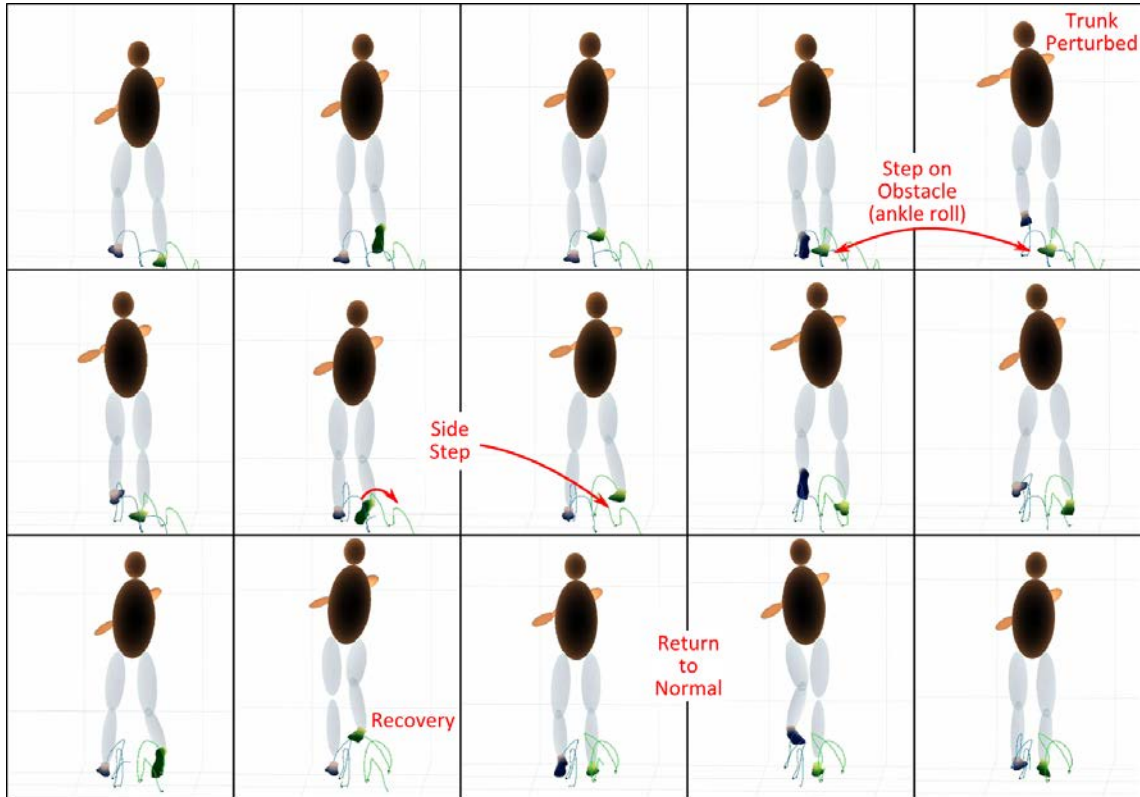

Figure 4. Loss of balance experienced by participant #2, with voice annotation, "Activity for the last hour and half or so. Got to our cottage, about 2-3 feet snow in the driveway. Probably 100-150 foot walk from the car on the road to the house in numerous trips, probably a lot of slip and slide."

The event starts with a faulty step of the right foot, shown as an unusual slow, sideways step. It is followed by a quick compensatory left foot step.

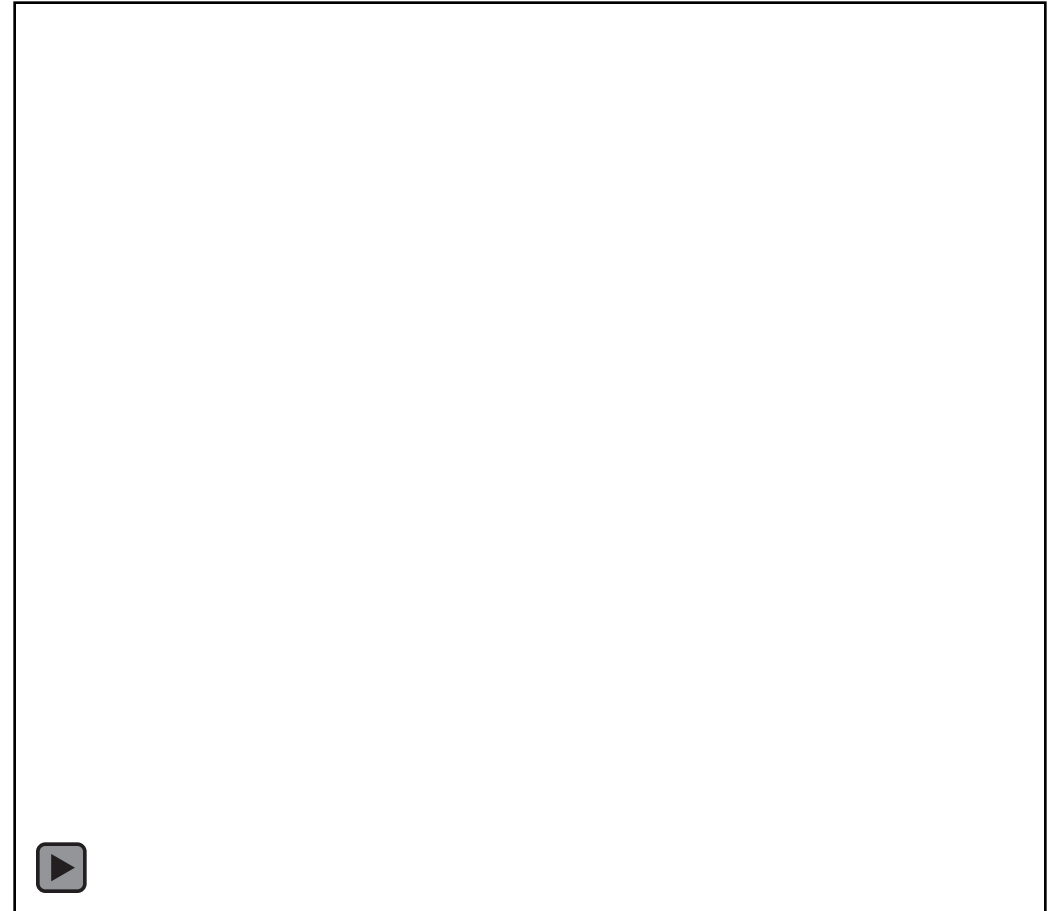



# Example - Fig. 5

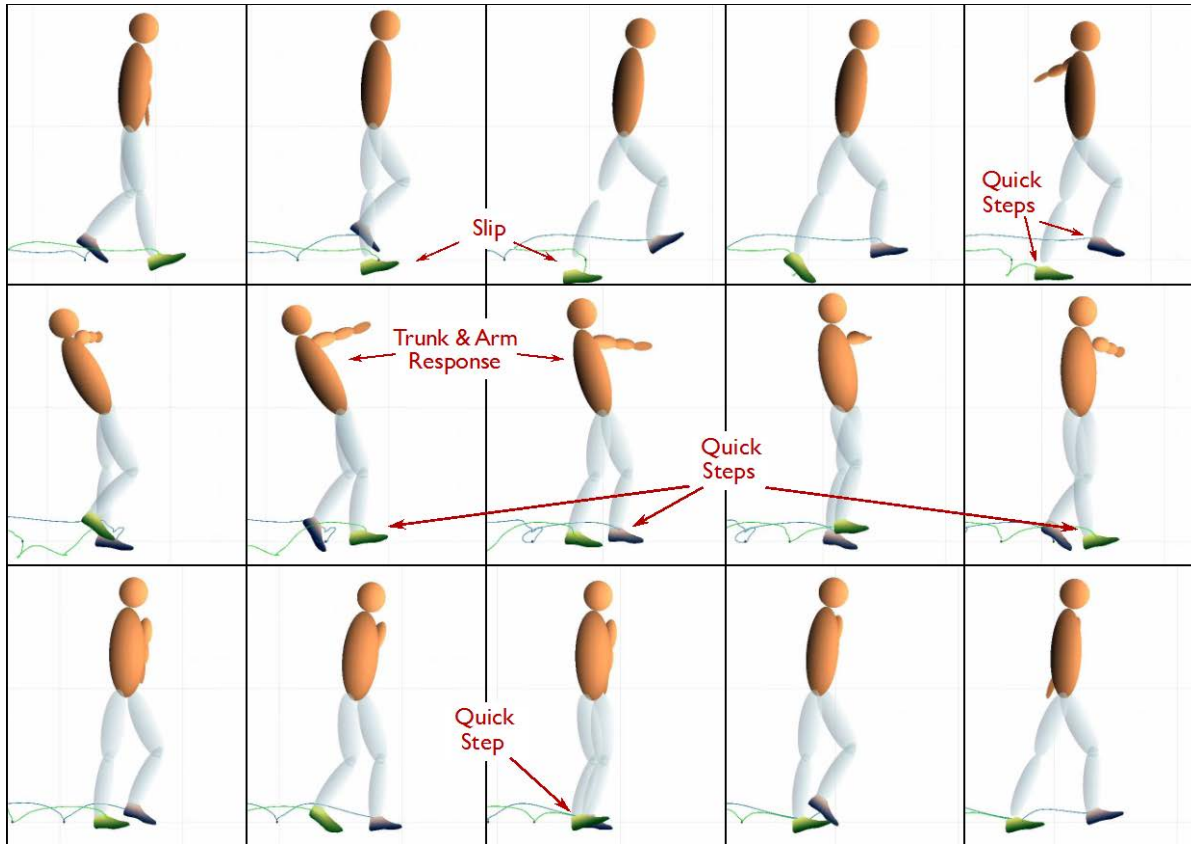

Figure 5. Loss of balance experienced by participant #3, with voice annotation, "Slipping and sliding on ice. Regained my balance."

The left foot slip is followed by several short and quick steps. The large compensatory trunk and arm response suggests a relatively severe disturbance.

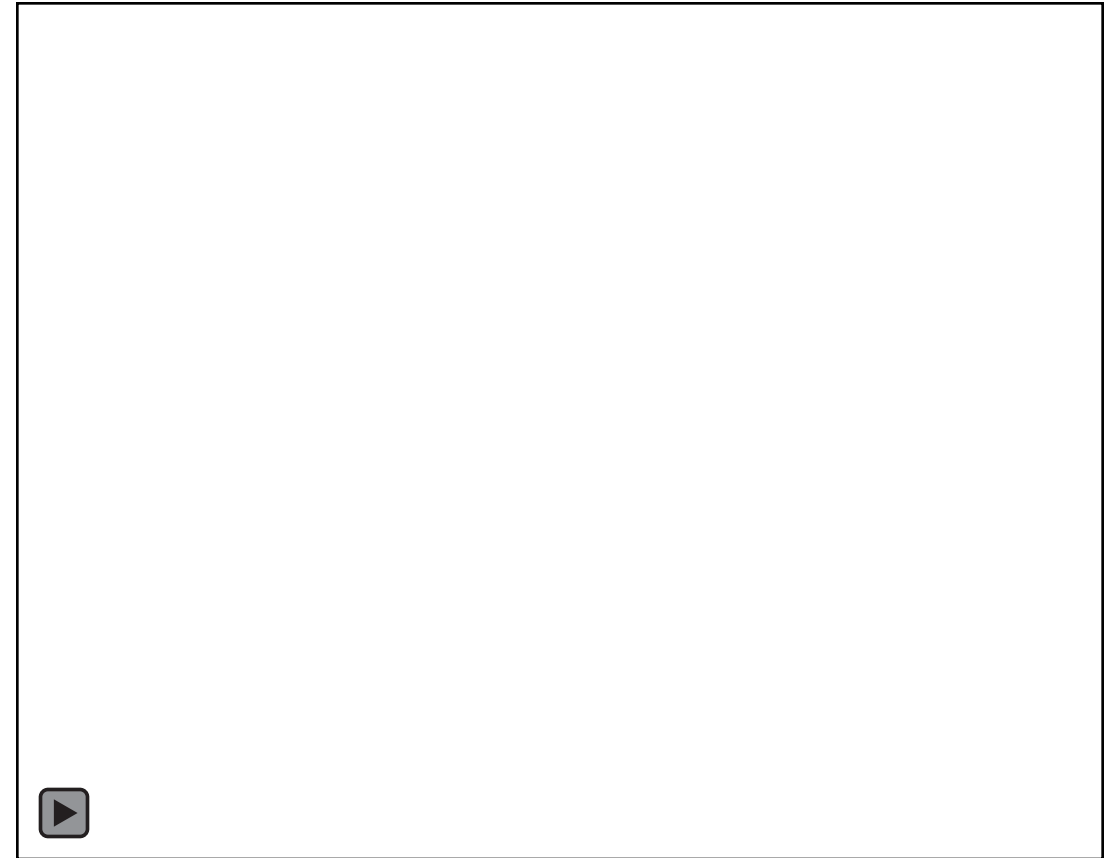

# Extra Examples

## Two-Foot Localization

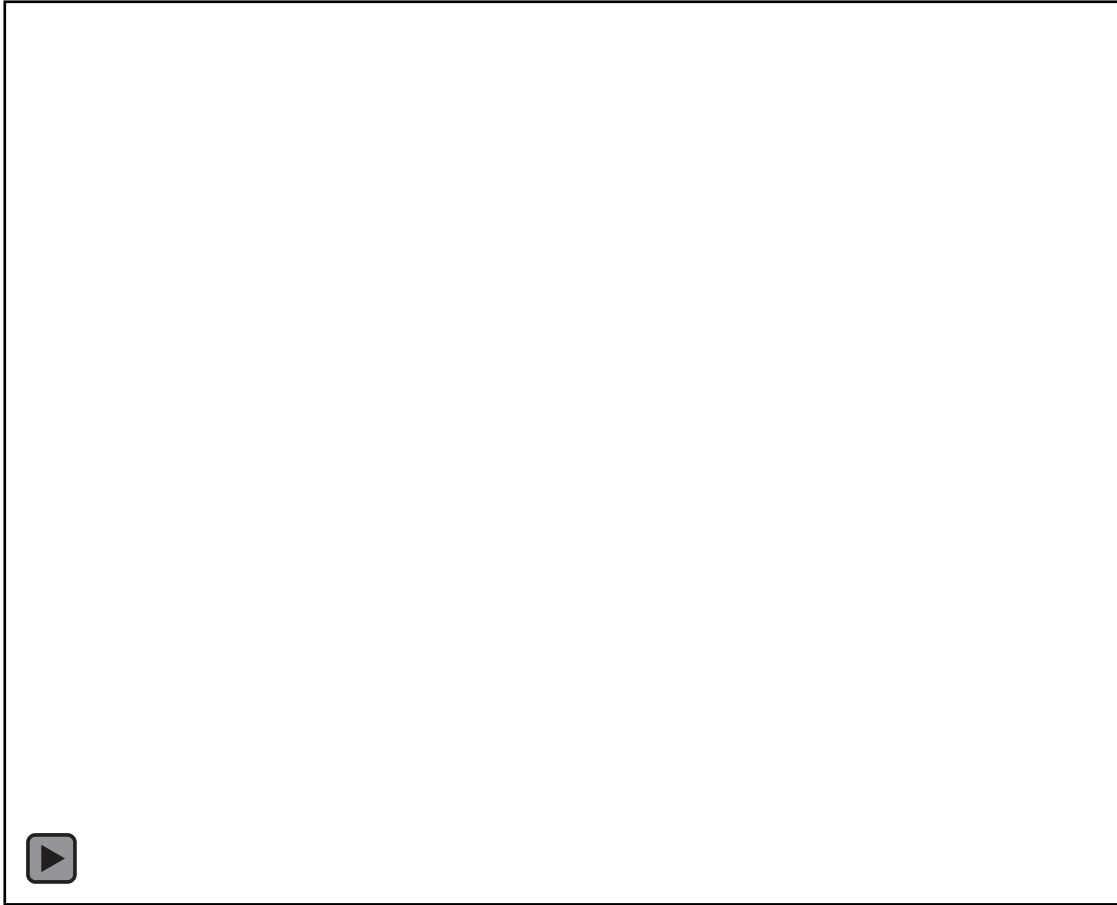

## Stairs

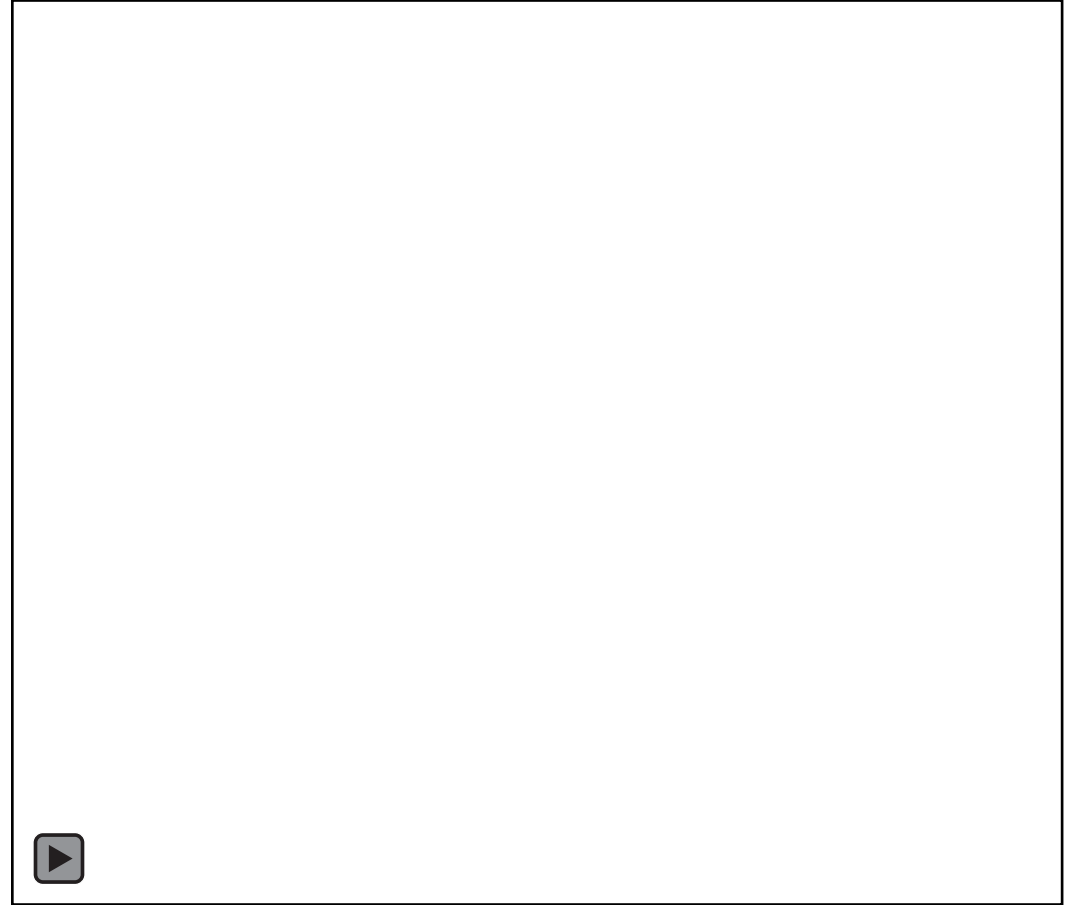

Supplement: NIHMS1519042-supplement-1.pdf [file NIHMS1519042-supplement-1.pdf]
